# Supplementary material for: Fe doped ZnO nanomaterials for energy storage applications as high-capacitance supercapacitor electrodes
Source: Royal Society of Chemistry journal article supplement (doi:10.1039/d6ra02336c), 2026-05-12
Supplement: d6ra02336c1.pdf [file d6ra02336c1.pdf]

# Supporting Information

## Fe doped ZnO nanomaterials for Energy Storage application as High-Capacitance Supercapacitor Electrode

Srikanth R. Veerabhadraiah et.al.,

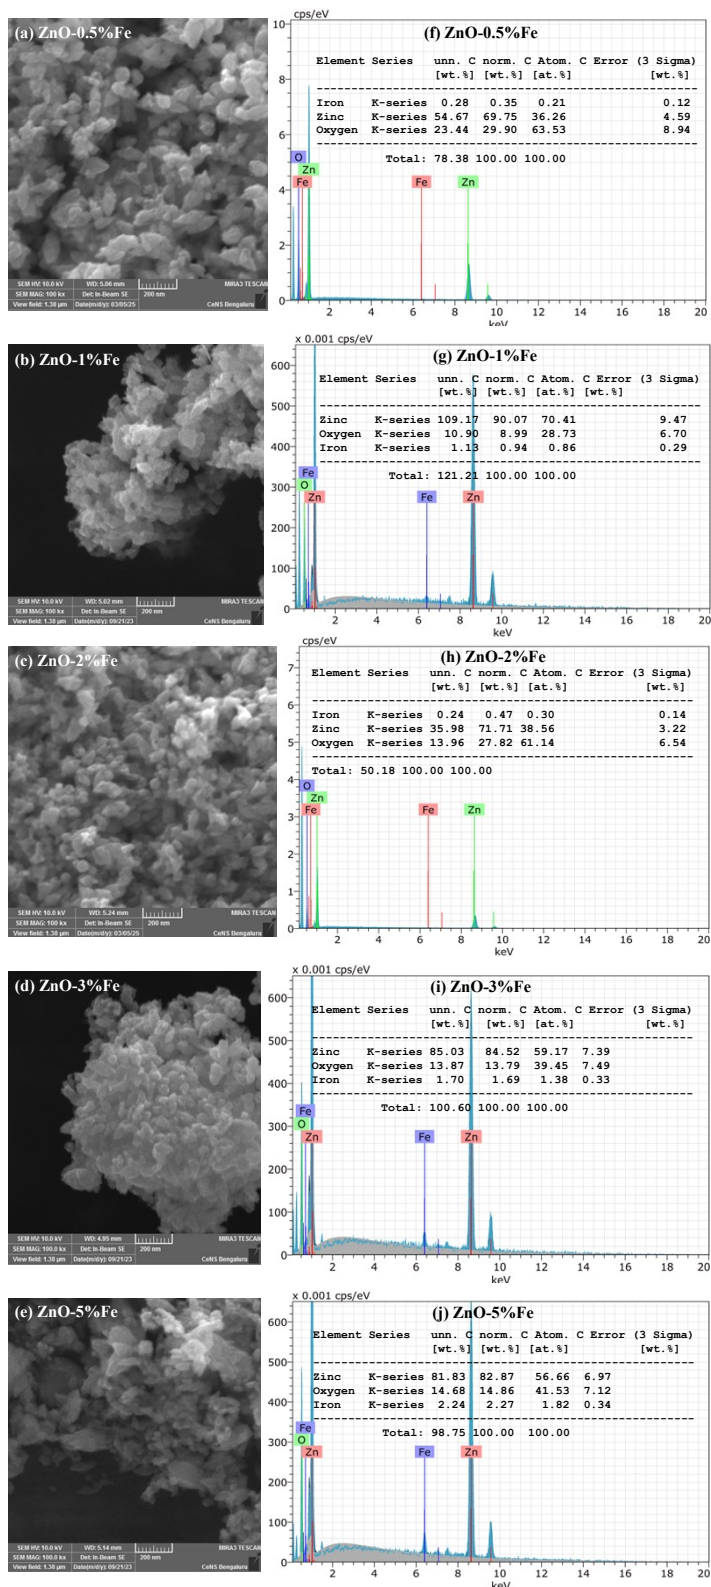

Figure S1: (a to e) FESEM images & (f to j) EDAX profile of ZnO-Fe nanomaterials.

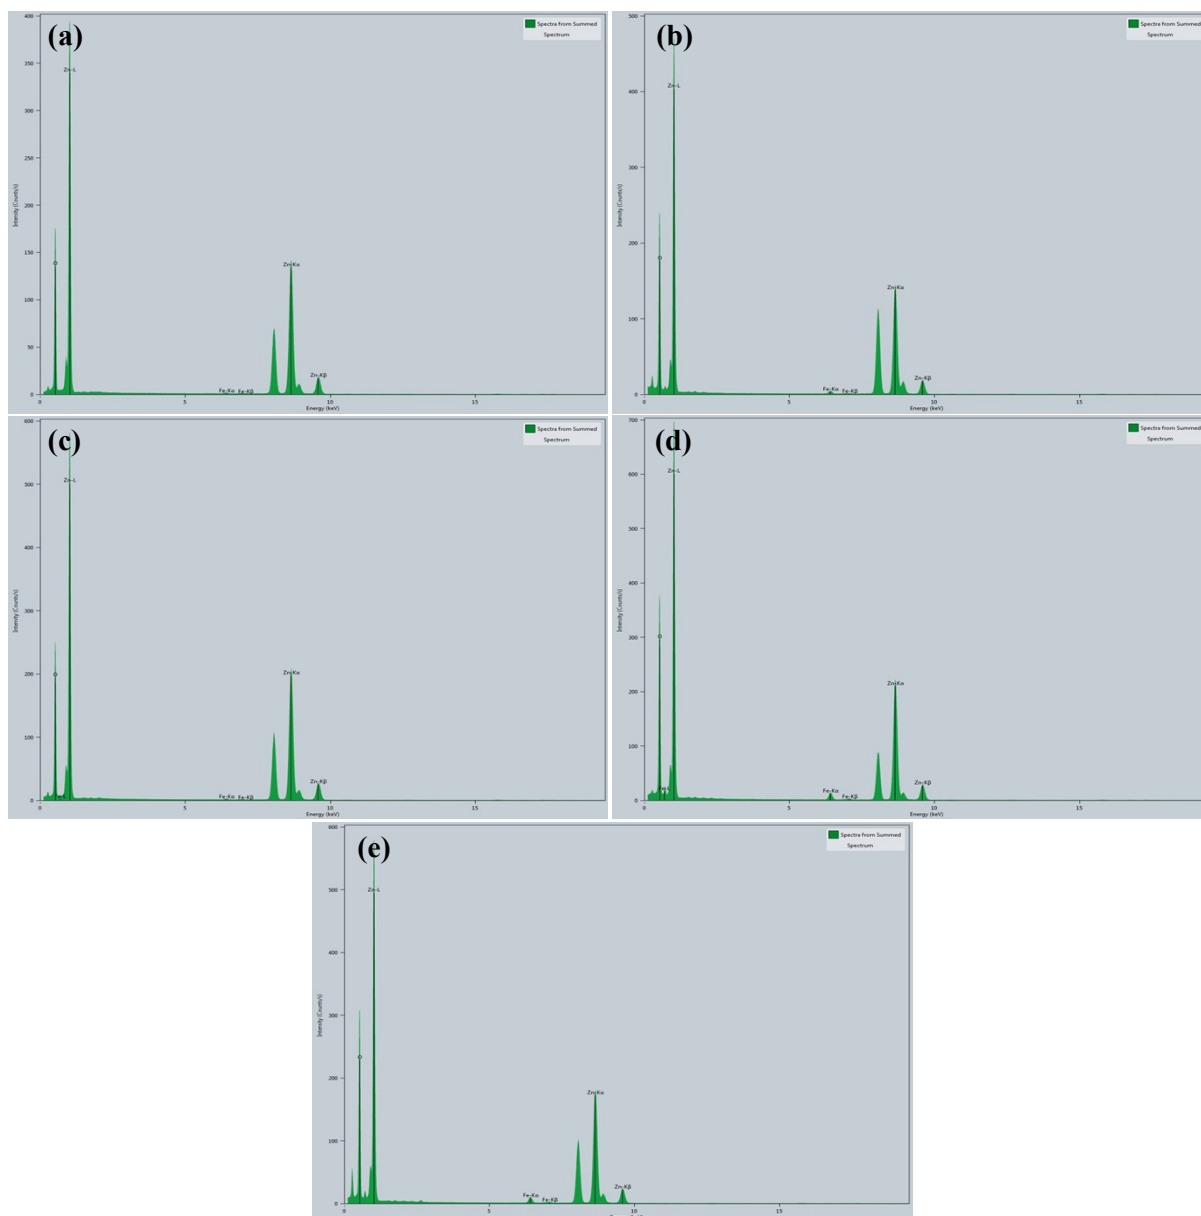

**Figure S2:** EDS plots (a) ZnO-Fe<sub>0.5%</sub>, (b) ZnO-Fe<sub>1.0%</sub>, (c) ZnO-Fe<sub>2.0%</sub>, (d) ZnO-Fe<sub>3.0%</sub>, (e) ZnO-Fe<sub>5.0%</sub> nanomaterials.

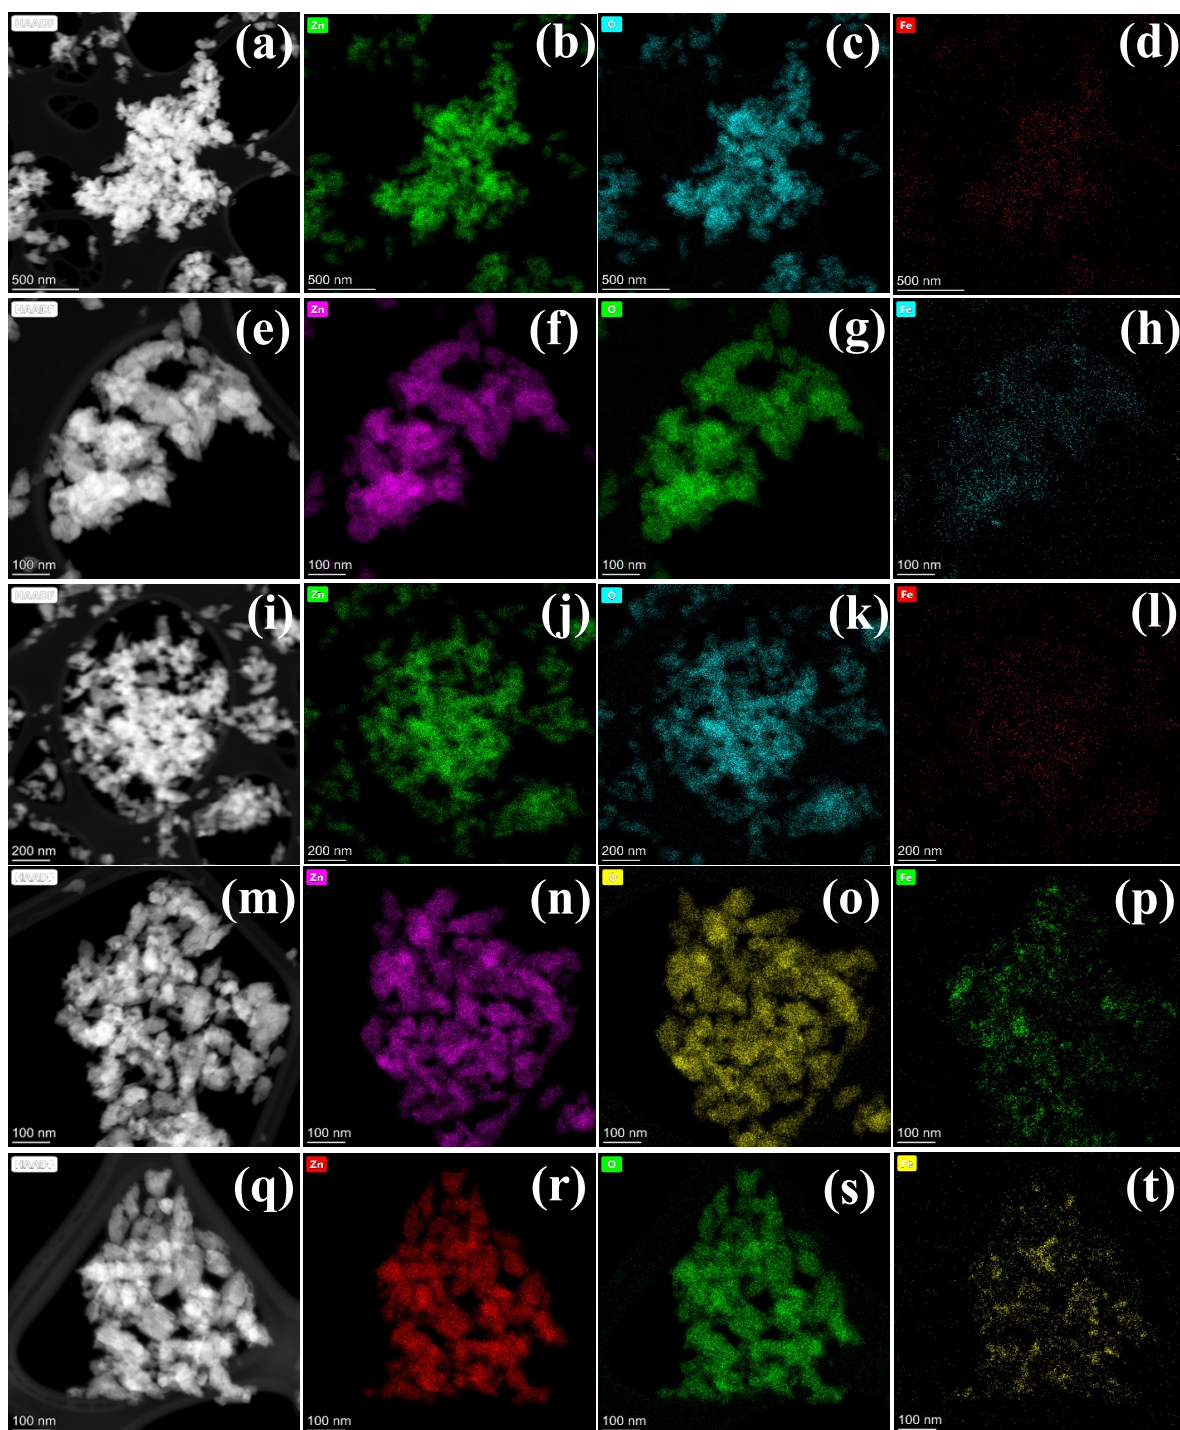

**Figure S3:** Elemental distribution of (a-d) ZnO-Fe<sub>0.5%</sub>, (e-h) ZnO-Fe<sub>1.0%</sub>, (i-l) ZnO-Fe<sub>2.0%</sub>, (m-p) ZnO-Fe<sub>3.0%</sub>, (q-t) ZnO-Fe<sub>5.0%</sub> nanomaterials.

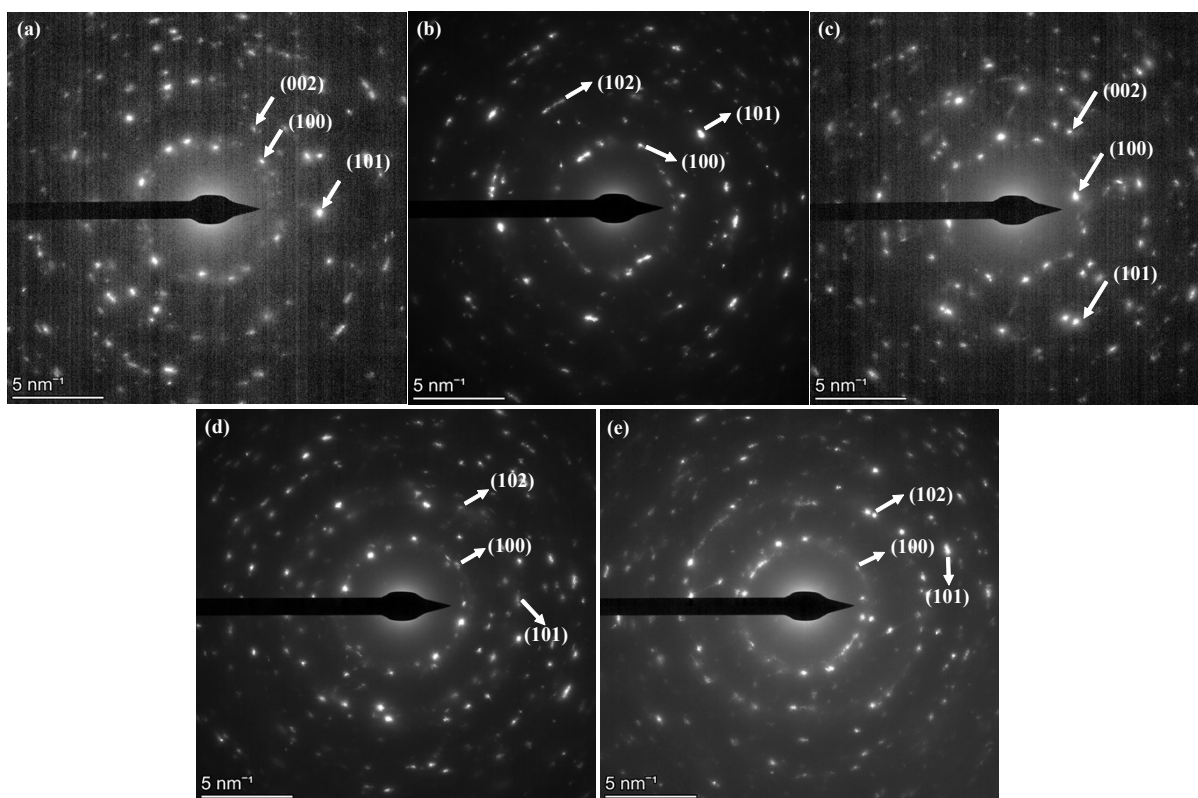

**Figure S4:** Images depicting the SAED patterns of (a) ZnO-Fe<sub>0.5%</sub>, (b) ZnO-Fe<sub>1.0%</sub>, (c) ZnO-Fe<sub>2.0%</sub>, (d) ZnO-Fe<sub>3.0%</sub>, (e) ZnO-Fe<sub>5.0%</sub> nanomaterials.

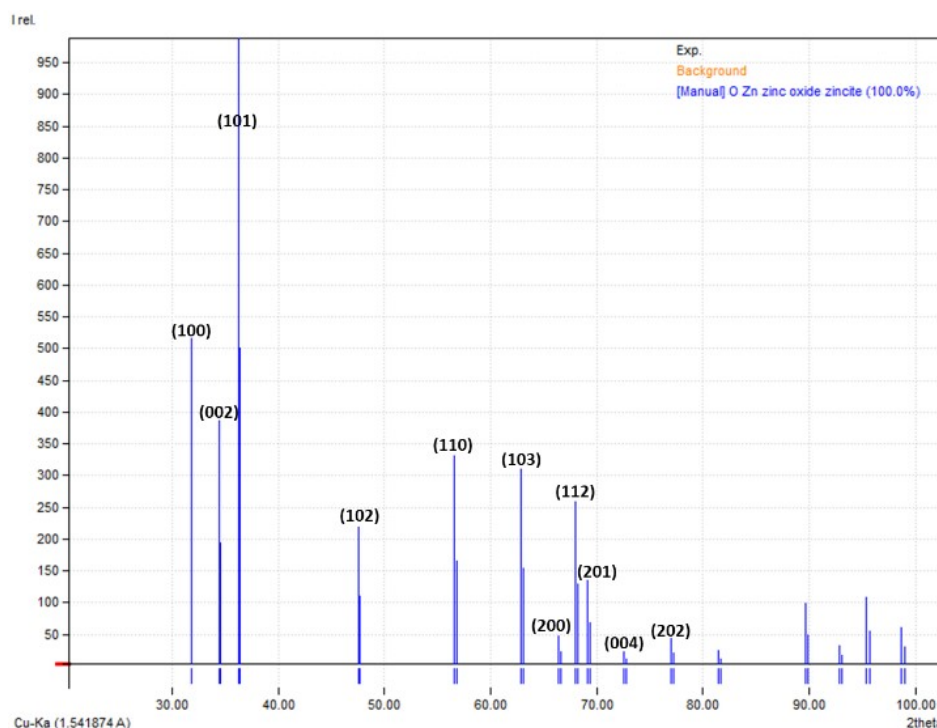

**Figure S5:** XRD pattern of ZnO (Crystallography Open Database (COD) card no: 2300450; Schreyer, Martin; Guo, Liangfeng; Thirunahari, Satyanarayana; Gao, Feng; Garland, Marc, Simultaneous determination of several crystal structures from powder mixtures: the combination of powder X-ray diffraction, band-target entropy minimization and Rietveld methods, *Journal of Applied Crystallography*, **2014**, 47,2, 659-667).
